# Supplementary material
Source: PubMed Central journal article supplement (PMC4241442)
Supplement: mmc1.pdf [file mmc1.pdf]

## Supporting Material:

### Electrostatic channeling in *P.falciparum* DHFR-TS: Brownian dynamics and Smoluchowski modeling

Vincent T. Metzger<sup>1,\*<sup>1</sup></sup>, Changsun Eun<sup>2,\*<sup>1</sup>,<sup>†</sup></sup>, Peter M. Kekenes-Huskey<sup>3,<sup>‡</sup></sup>, Gary Huber<sup>2</sup>, and J. Andrew McCammon<sup>1,2,3</sup>

<sup>1</sup> Department of Chemistry and Biochemistry, University of California San Diego, La Jolla, California 92093, USA

<sup>2</sup> Howard Hughes Medical Institute, University of California San Diego, La Jolla, California 92093, USA

<sup>3</sup> Department of Pharmacology, University of California San Diego, La Jolla, California 92093, USA

\* Authors contributed equally to this work.

<sup>1</sup> Corresponding author: V. T. Metzger (vincent.t.metzger@gmail.com), C. Eun (changsun.eun@gmail.com)

<sup>†</sup> Present address: Laboratory for Computational Biology and Biophysics, Department of Biological Engineering, Massachusetts Institute of Technology, Cambridge, Massachusetts 02139, USA

<sup>‡</sup> Present address: Department of Chemistry, University of Kentucky, Lexington, Kentucky 40506, USA

#### ***A: Brownian Dynamics of DHFR Reactive-site Size***

Because experimental evidence indicates that *L. major* DHFR-TS has a dihydrofolate transfer efficiency of approximately 80% (1), Brownian dynamics simulations were performed on a variety of *L. major* systems each with a unique active-site definition (as defined by a sphere centered at an atom in the approximate “middle” of the solvent-accessible active-site). The “12.5 angstrom” active-site size resembles the definition used in *L. major* DHFR-TS BrownDye simulations, which were shown to reproduce experimentally predicted channelling efficiency of this system. As shown in Fig. S1 below, increasing the size of the DHFR reactive-region increases the predicted channelling efficiency. We selected the 12.5 Angstrom-sized reactive zone for *P. falciparum* for reasonable comparison with *L. major*.

Figure S1: Brownian Dynamics of DHFR Reactive-Site Size for *Plasmodium falciparum* DHFR-TS

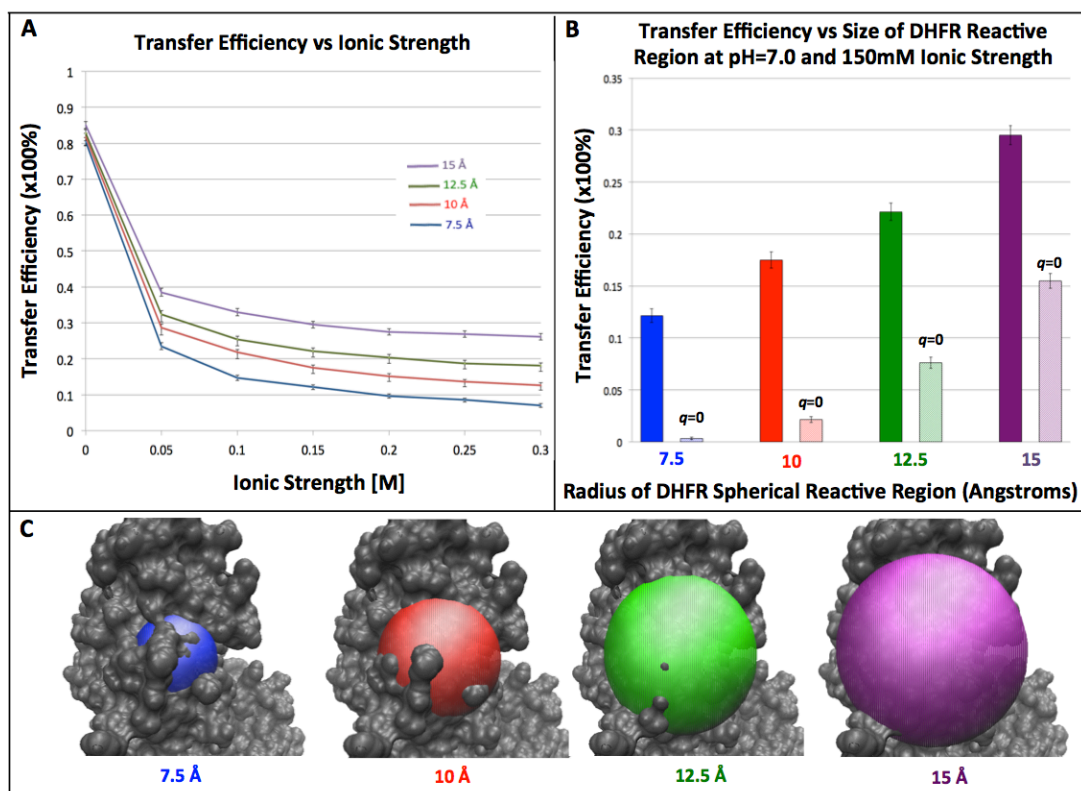

***B: List of Basic Residues Assigned Zero Charge in “Charge-Removed” System***

Note: Residue ID’s below are from PDB 1J3I and all atoms in these amino acids were assigned a charge of zero for both monomers of the bifunctional *P. falciparum* DHFR-TS. These residues were first postulated by (2) as possibly being involved in forming two electropositive “paths” connecting the TS and DHFR-TS active sites and are listed below:

path 1: 19, 28, 49, 114, 115, 117, 122, 373, 377, 402

path 2: 19, 49, 56, 114, 115, 117, 122, 345, 416, 417, 457, 464, 471, 530, 575, 581

***Supporting Citations***

1. Elcock, A. H., M. J. Potter, D. A. Matthews, D. R. Knighton, and J. A. McCammon. 1996. Electrostatic channeling in the bifunctional enzyme dihydrofolate reductase-thymidylate synthase. *Journal of molecular biology* 262:370-374.
2. Yuvaniyama, J., P. Chitnumsub, S. Kamchonwongpaisan, J. Vanichtanankul, W. Sirawaraporn, P. Taylor, M. D. Walkinshaw, and Y. Yuthavong. 2003. Insights into antifolate resistance from malarial DHFR-TS structures. *Nat Struct Biol* 10:357-365.
